# Supplementary material for: In vitro gastrointestinal stability and intestinal absorption of ACE-1 and DPP4 inhibitory peptides from poultry by-product hydrolysates
Source: Royal Society of Chemistry journal article supplement (doi:10.1039/d4fo01214c), 2024-01-01
Supplement: d4fo01214c1.pdf [file d4fo01214c1.pdf]

1 *Supplementary material for:*

2

3 ***In vitro* gastrointestinal stability and intestinal absorption of**  
4 **ACE-1 and DPP4 inhibitory peptides from poultry by-product**  
5 **hydrolysate**

6 Liudmila Sorokina<sup>a,b</sup>, Nina Therese Solberg<sup>a</sup>, Shiori Koga<sup>a</sup>, Sissel Beate Rønning<sup>a</sup>, Nils Kristian  
7 Afseth<sup>a</sup>, Steven Ray Wilson<sup>b</sup>, Anne Rieder<sup>a\*</sup>, and Sileshi Gizachew Wubshet<sup>a\*</sup>

8

9

10 <sup>a</sup> Nofima AS-Norwegian Institute of Food, Fisheries and Aquaculture Research, PB 210, N-  
11 1431 Ås, Norway

12 <sup>b</sup> Department of Chemistry, University of Oslo, Oslo, Norway

13

14 \*Corresponding authors:

15 Tel.: +47 909 17 126

16 *E-mail address:* sileshi.wubshet@nofima.no (Sileshi Gizachew Wubshet).

17 Tel.: +47 992 77 503

18 *E-mail address:* anne.rieder@nofima.no (Anne Rieder).

19

20 *Table S1 – Selected genes with the corresponding Taqman primer/probes.*

| Taqman primer/probe | Gene           |
|---------------------|----------------|
| Hs02800695_m1       | <i>HPRT1</i>   |
| Hs00192639_m1       | <i>SLC15A1</i> |
| Hs00184500_m1       | <i>ABCB1</i>   |
| Hs00900408_m1       | <i>CDH17</i>   |
| Hs01030343_m1       | <i>SLCO2B1</i> |
| Hs05465837_g1       | <i>OCLN</i>    |
| Hs01078080_m1       | <i>CDX2</i>    |
| Hs01113665_m1       | <i>SLC15A2</i> |
| Hs00975961_g1       | <i>NFE2L2</i>  |
| Hs01551861_m1       | <i>TJP1</i>    |

21

22 *Table S2 – Peak area of the bioactive peptides VL, IY and YA in the in vitro digestion experiment. The peak areas are calculated*  
 23 *from ion counts of extracted ion chromatograms (EIC) corresponding to the molecular ion peaks [M+H]<sup>+</sup> of the respective*  
 24 *peptides.*

| sample type                                    | replicate                  | Peak area |          |         |
|------------------------------------------------|----------------------------|-----------|----------|---------|
|                                                |                            | VL        | IY       | YA      |
| Digest                                         | a                          | 65299023  | 17630985 | 1703702 |
|                                                | b                          | 63817034  | 16977368 | 1641682 |
|                                                | c                          | 63944605  | 17068163 | 1653856 |
|                                                | average                    | 64353554  | 17225505 | 1666413 |
|                                                | SD                         | 821281    | 354078   | 32862   |
|                                                | SD relative to average (%) | 1.3       | 2.1      | 2.0     |
| LMWPF control                                  | a                          | 64391889  | 16516229 | 1448975 |
|                                                | b                          | 64068245  | 16624540 | 1441466 |
|                                                | c                          | 64810522  | 16834370 | 1473378 |
|                                                | average                    | 64423552  | 16658379 | 1454607 |
|                                                | SD                         | 372150    | 161748   | 16685   |
|                                                | SD relative to average (%) | 0.6       | 1.0      | 1.1     |
| enzymes' control                               | a                          | 483605    | 190412   | 50245   |
|                                                | b                          | 473166    | 182366   | 50658   |
|                                                | c                          | 473554    | 201515   | 63155   |
|                                                | average                    | 476775    | 191431   | 54686   |
|                                                | SD                         | 5918      | 9615     | 7337    |
|                                                | SD relative to average (%) | 1.2       | 5.0      | 13.4    |
| digest (%) relative to LMWPF control           |                            | 99.9      | 103.4    | 114.6   |
| enzymes' control (%) relative to LMWPF control |                            | 0.7       | 1.1      | 3.8     |

25

26

27 Table S3 – Peak area of the bioactive peptides VL, IY and YA from LMWPF identified in control transport experiment without  
 28 Caco-2 cells and in 1 mg/mL LMWPF stock used for the experiment.

| Sample type           |           | VL       |                             |           | YA     |                             |           | IY      |                             |           |
|-----------------------|-----------|----------|-----------------------------|-----------|--------|-----------------------------|-----------|---------|-----------------------------|-----------|
| side                  | replicate | Area     | relative to LMWPF stock (%) | AP+BL (%) | Area   | relative to LMWPF stock (%) | AP+BL (%) | Area    | relative to LMWPF stock (%) | AP+BL (%) |
| AP                    | a         | 11896975 | 52                          | 68        | 170732 | 47                          | 63        | 2502601 | 49                          | 61        |
| BL                    | a         | 3775127  | 16                          |           | 54622  | 15                          |           | 591611  | 12                          |           |
| AP                    | b         | 12772183 | 55                          | 70        | 161193 | 45                          | 59        | 2551334 | 50                          | 61        |
| BL                    | b         | 3448020  | 15                          |           | 52056  | 14                          |           | 545039  | 11                          |           |
| AP                    | c         | 12665801 | 55                          | 71        | 155244 | 43                          | 57        | 2191511 | 43                          | 56        |
| BL                    | c         | 3624464  | 16                          |           | 48579  | 13                          |           | 633087  | 12                          |           |
| Average of replicates |           |          |                             | 70        |        |                             | 59        |         |                             | 59        |
| LMWPF stock           |           | 23063220 | 100                         |           | 360122 | 100                         |           | 5073218 | 100                         |           |

29

30 Table S4 – TEER measurements in ohm/cm<sup>2</sup> before and after Caco-2 monolayer transport experiments.

| well    | Transport experiment 1 |                   |                  | Transport experiment 2 |                   |                  | Transport experiment 3 |                   |                  |
|---------|------------------------|-------------------|------------------|------------------------|-------------------|------------------|------------------------|-------------------|------------------|
|         | day before             | before experiment | after experiment | day before             | before experiment | after experiment | day before             | before experiment | after experiment |
| A1      | 762                    | 869               | 1003             | 884                    | 1004              | 1031             | 876                    | 862               | 872              |
| A2      | 813                    | 966               | 1071             | 866                    | 925               | 991              | 797                    | 863               | 842              |
| A3      | 768                    | 939               | 1043             | 876                    | 973               | 988              | 708                    | 805               | 773              |
| A4      | 741                    | 947               | 1079             | 852                    | 981               | 1020             | 845                    | 876               | 835              |
| B1      | 752                    | 1006              | 1097             | 903                    | 965               | 1013             | 794                    | 889               | 885              |
| B2      | 746                    | 782               | 966              | 853                    | 894               | 920              | 739                    | 710               | 723              |
| B3      | 726                    | 839               | 993              | 845                    | 904               | 917              | 739                    | 812               | 782              |
| B4      | 729                    | 973               | 1049             | 867                    | 947               | 982              | 805                    | 811               | 786              |
| C1      | 821                    | 1104              | 1167             | 955                    | 997               | 1081             | 913                    | 927               | 954              |
| C2      | 771                    | 983               | 1073             | 955                    | 1022              | 1075             | 866                    | 876               | 920              |
| C3      | 832                    | 1033              | 1124             | 965                    | 1050              | 1091             | 867                    | 973               | 925              |
| C4      | 813                    | 1067              | 1138             | 950                    | 1068              | 1066             | 916                    | 939               | 913              |
| Average | 773                    | 959               | 1067             | 898                    | 977               | 1015             | 822                    | 862               | 851              |

31

32 Table S5 – Paracellular transport test across Caco-2 cell monolayers using 10 kDa FITC-d.

|           |              | FITC-d equivalent |              |              |
|-----------|--------------|-------------------|--------------|--------------|
|           |              | Experiment 1      | Experiment 2 | Experiment 3 |
| LMWPF     | 1 mg/mL      | -0.5              | -0.9         | -1.3         |
| IY        | 100 mg/mL    | -0.4              | -0.9         | -1.2         |
| YA        | 100 mg/mL    | -0.5              | -0.9         |              |
| control   | DMEM         | -0.5              | -0.9         |              |
| No Caco-2 | only filters | 140.64            |              |              |

33

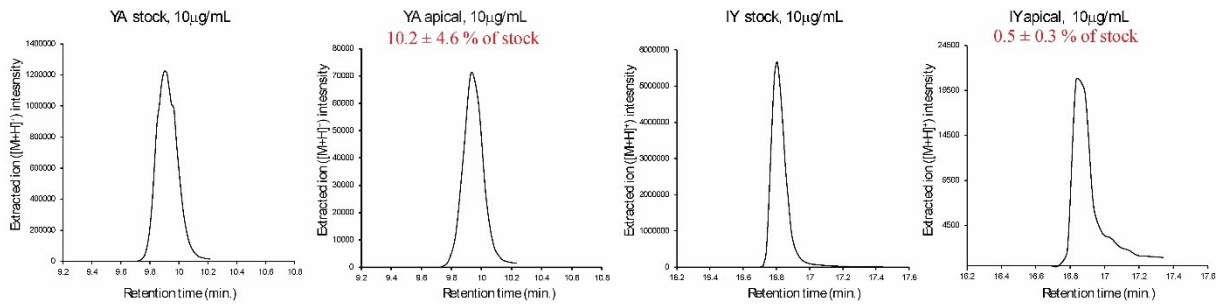

34

35 Figure S1: Representative extracted ion chromatogram of 10µg/mL stock solution of peptides YA and IY as well as the  
 36 corresponding samples collected from the apical side after the transport experiment. On average 10.2 and 0.5% of the initial  
 37 stock concentration was adequately detected after on the apical side after 4 hours of incubation for YA and IY, respectively.

38

39

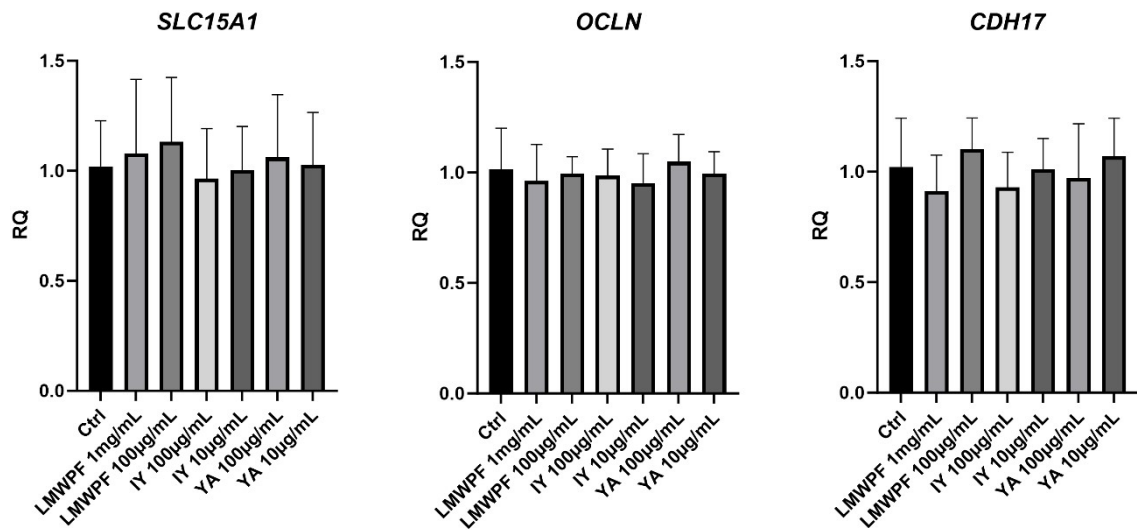

40

41 Figure S2 – Relative gene expression of genes in Caco-2 cells encoding SLC15A1, OCLN, and CDH17 incubated with LMWPF  
 42 (100 µg/mL and 1 mg/mL) or synthetic peptides VL and YA (10 and 100 µg/mL) in comparison to the control treatment with  
 43 culture medium (Ctrl). Differences between treatments are determined by one-way ANOVA.

44

45
